# Supplementary material for: Inflammatory and Humoral Immune Response during Ebola Virus Infection in Survivor and Fatal Cases Occurred in Sierra Leone during the 2014–2016 Outbreak in West Africa
Source: MDPI journal article supplement (doi:10.3390/v11040373), 2019-04-23
Supplement: s1 [file s1]

**Table S3.** Kinetics of the anti-EBOV antibodies response and viremia in EVD fatal and survived patients.

| SURVIVORS | DSO     | 2     | 3     | 4     | 5      | 6     | 7     | 8      | 9     | 10    | 11    | 12    | 13     | 14    | 15     | 16     |
|-----------|---------|-------|-------|-------|--------|-------|-------|--------|-------|-------|-------|-------|--------|-------|--------|--------|
| 1         | IgM     |       |       |       | 1:80   |       | 1:320 | 1:320  |       |       |       |       |        |       |        |        |
|           | IgG     |       |       |       | 1:40   |       | 1:320 | 1:1280 |       |       |       |       |        |       |        |        |
|           | Viremia |       |       |       | 6.5    |       | 4.2   | <3.1   |       |       |       |       |        |       |        |        |
| 2         | IgM     |       |       |       |        | <1:20 |       |        | <1:20 |       |       | 1:160 |        |       |        | 1:640  |
|           | IgG     |       |       |       |        | <1:20 |       |        | <1:20 |       |       | 1:320 |        |       |        | 1:1280 |
|           | Viremia |       |       |       |        | 8.2   |       |        | 8.5   |       |       | 5.3   |        |       |        | <3.1   |
| 3         | IgM     |       |       | <1:20 |        | 1:20  |       |        |       |       |       |       |        | 1:160 | 1:640  |        |
|           | IgG     |       |       |       |        | 1:160 |       |        |       |       |       |       |        | 1:640 | 1:1280 |        |
|           | Viremia |       |       | 7.3   |        | 7.4   |       |        |       |       |       |       |        | 3.6   | <3.1   |        |
| 4         | IgM     |       |       |       |        |       |       | <1:20  | <1:20 |       | 1:40  | 1:160 |        |       |        | 1:640  |
|           | IgG     |       |       |       |        |       |       |        | 1:80  |       | 1:160 | 1:320 |        |       |        | 1:1280 |
|           | Viremia |       |       |       |        |       |       | 7.1    | 6.8   |       | 6.2   | 5.3   |        |       |        | <3.1   |
| 5         | IgM     |       | <1:20 | <1:20 | <1:20  |       | 1:20  |        |       | 1:160 |       |       | 1:160  |       |        |        |
|           | IgG     |       | <1:20 | <1:20 | <1:20  |       | 1:20  |        |       | 1:640 |       |       | 1:1280 |       |        |        |
|           | Viremia |       | 7.6   | 8.2   | 7.3    |       | 5.6   |        |       | 4.4   |       |       | <3.1   |       |        |        |
| 6         | IgM     | 1:20  |       | 1:20  | 1:40   | 1:40  |       | 1:640  |       |       |       |       |        |       |        |        |
|           | IgG     | 1:20  |       | 1:20  | 1:40   | 1:160 |       | 1:640  |       |       |       |       |        |       |        |        |
|           | Viremia | 8.2   |       | 7.6   | 7.3    | 5.3   |       | <3.1   |       |       |       |       |        |       |        |        |
| 7         | IgM     | <1:20 | <1:20 | <1:20 | <1:20  | <1:20 | 1:20  | 1:20   |       | 1:40  | 1:320 | 1:320 |        |       |        |        |
|           | IgG     | <1:20 | <1:20 | <1:20 | <1:20  | <1:20 | 1:20  | 1:40   |       | 1:320 | 1:320 | 1:640 |        |       |        |        |
|           | Viremia | 6.2   | 6.5   | 7.3   | 7.1    | 7.6   | 7.3   | 7.4    |       | 6.2   | 5.3   | <3.1  |        |       |        |        |
| 8         | IgM     |       |       | <1:20 | <1:20  | <1:20 | <1:20 |        |       |       | <1:20 |       |        |       |        |        |
|           | IgG     |       |       | <1:20 | <1:20  |       | 1:160 |        |       |       | 1:640 |       |        |       |        |        |
|           | Viremia |       |       | 7.1   | 7.6    | 6.8   | 6.5   |        |       |       | <3.1  |       |        |       |        |        |
| 9         | IgM     |       |       |       | <1:20  | <1:20 |       |        | 1:80  |       |       |       |        |       |        |        |
|           | IgG     |       |       |       |        | 1:80  |       |        | 1:320 |       |       |       |        |       |        |        |
|           | Viremia |       |       |       | 7.1    | 6.2   |       | 4.7    | 3.9   |       |       | <3.1  |        |       |        |        |
| 10        | IgM     |       |       |       | <1:20  |       | 1:40  |        |       |       |       |       |        |       |        |        |
|           | IgG     |       |       |       | 1:20   |       | 1:640 |        |       |       |       |       |        |       |        |        |
|           | Viremia |       |       |       | 6.8    |       | 5.6   |        |       |       | <3.11 |       |        |       |        |        |
| 11        | IgM     |       |       |       |        |       |       | <1:20  | <1:20 | <1:20 | <1:20 | <1:20 |        |       |        | 1:20   |
|           | IgG     |       |       |       |        |       |       | 1:80   | 1:160 | 1:160 | 1:160 | 1:160 |        |       |        | 1:640  |
|           | Viremia |       |       |       |        |       |       | 7.1    | 7.3   | 6.9   | 6.0   | 4.7   | 4.4    |       |        | <3.1   |
| 12        | IgM     |       |       |       |        |       |       | <1:20  | <1:20 | 1:40  | 1:40  | 1:40  |        |       |        |        |
|           | IgG     |       |       |       |        |       |       | 1:20   | 1:20  |       |       | 1:80  |        |       |        | 1:1280 |
|           | Viremia |       |       |       |        |       |       | 8.5    | 8.0   | 8.2   | 7.3   | 6.2   |        |       |        | <3.1   |
| 13        | IgM     |       |       |       | 1:80   |       |       |        |       |       |       |       |        |       |        |        |
|           | IgG     |       |       |       | 1:1280 |       |       |        |       |       |       |       |        |       |        |        |
|           | Viremia |       |       |       | 6.4    |       |       | 4.6    | <3.1  |       |       |       |        |       |        |        |

| FATAL | DSO     | 2    | 3    | 4     | 5     | 6     | 7     | 8     | 9     | 10    | 11    | 12    | 13    | 14    | 15    | 16    |
|-------|---------|------|------|-------|-------|-------|-------|-------|-------|-------|-------|-------|-------|-------|-------|-------|
| 1     | IgM     |      |      | <1:20 |       | <1:20 |       | 1:20  |       |       |       |       |       |       |       |       |
|       | IgG     |      |      | <1:20 |       | <1:20 | <1:20 | <1:20 |       |       |       |       |       |       |       |       |
|       | Viremia |      |      | 7.2   |       | 8.1   | 8.4   | 8.3   |       |       |       |       |       |       |       |       |
| 2     | IgM     |      |      | <1:20 | <1:20 |       | 1:20  | 1:20  | 1:20  |       |       |       |       |       |       |       |
|       | IgG     |      |      | <1:20 | <1:20 | <1:20 | <1:20 | 1:20  | 1:40  |       |       |       |       |       |       |       |
|       | Viremia |      |      | 9.3   | 9.5   | 9.0   | 9.6   | 9.1   | 9.0   |       |       |       |       |       |       |       |
| 3     | IgM     |      |      | <1:20 | 1:20  |       |       |       | 1:20  |       | 1:20  |       |       | 1:20  |       |       |
|       | IgG     |      |      | <1:20 | 1:20  |       |       |       | 1:20  |       | 1:20  |       |       | 1:80  |       |       |
|       | Viremia |      |      | 9.9   | 8.9   |       |       |       | 8.7   |       | 7.9   |       |       | 6.6   |       |       |
| 4     | IgM     |      |      |       |       |       |       |       |       |       | 1:160 | 1:160 |       | 1:160 |       |       |
|       | IgG     |      |      |       |       |       |       |       |       |       | 1:320 |       |       | 1:640 |       |       |
|       | Viremia |      |      |       |       |       |       |       |       |       | 7.8   | 6.9   |       | 6.5   |       |       |
| 5     | IgM     | 1:20 | 1:20 | 1:80  | 1:160 |       |       |       | <1:20 |       |       |       |       |       |       |       |
|       | IgG     |      | 1:20 | 1:20  | 1:40  |       |       |       | 1:80  | 1:80  |       |       |       |       |       |       |
|       | Viremia | 7.6  | 7.0  | 7.1   | 6.8   |       |       |       | 5.1   | 6.4   |       |       |       |       |       |       |
| 6     | IgM     |      |      |       | <1:20 | <1:20 | <1:20 | <1:20 | <1:20 | <1:20 | <1:20 |       |       |       |       |       |
|       | IgG     |      |      |       | <1:20 | <1:20 | <1:20 | 1:20  | 1:20  | 1:20  | 1:40  |       |       |       |       |       |
|       | Viremia |      |      |       | 8.3   | 8.2   | 7.6   | 8.2   | 8.2   | 8.4   | 8.6   |       |       |       |       |       |
| 7     | IgM     |      |      | <1:20 |       | <1:20 | <1:20 | <1:20 | <1:20 | <1:20 |       | 1:20  | 1:20  |       | 1:20  |       |
|       | IgG     |      |      | <1:20 |       | <1:20 | <1:20 | 1:20  | 1:20  | 1:20  |       | 1:40  |       |       | 1:160 |       |
|       | Viremia |      |      | 7.3   |       | 8.7   | 8.2   | 8.6   | 7.8   | 7.5   |       | 6.5   | 6.1   |       | 6.6   |       |
| 8     | IgM     |      |      |       |       | <1:20 | <1:20 | <1:20 | <1:20 |       |       |       |       |       |       |       |
|       | IgG     |      |      |       |       | <1:20 | <1:20 | <1:20 | <1:20 |       |       |       |       |       |       |       |
|       | Viremia |      |      |       |       | 8.9   | 9.2   | 9.6   | 9.5   |       |       |       |       |       |       |       |
| 9     | IgM     |      |      |       |       |       |       |       |       |       | <1:20 | <1:20 | <1:20 |       |       |       |
|       | IgG     |      |      |       |       |       |       |       |       |       | <1:20 | <1:20 | <1:20 |       |       |       |
|       | Viremia |      |      |       |       |       |       |       |       |       | 9.7   | 9.2   | 10    |       |       |       |
| 10    | IgM     |      |      |       |       |       |       |       |       |       |       | 1:40  | 1:40  | 1:40  |       | 1:80  |
|       | IgG     |      |      |       |       |       |       |       |       |       |       | 1:40  | 1:40  | 1:40  |       | 1:320 |
|       | Viremia |      |      |       |       |       |       |       |       |       |       | 5.2   | 5.6   | 5.2   |       | 4.6   |
| 11    | IgM     |      |      |       |       | <1:20 | <1:20 | <1:20 | <1:20 | <1:20 | <1:20 |       |       |       |       |       |
|       | IgG     |      |      |       |       | <1:20 | <1:20 | <1:20 | <1:20 | <1:20 | <1:20 |       |       |       |       |       |
|       | Viremia |      |      |       |       | 9.4   | 9.0   | 8.2   | 8.1   | 8.2   | 8.5   |       |       |       |       |       |
| 12    | IgM     |      |      |       |       |       | <1:20 | <1:20 | <1:20 | <1:20 | <1:20 |       |       |       |       |       |
|       | IgG     |      |      |       |       |       | 1:20  | <1:20 | 1:20  | 1:20  | 1:20  |       |       |       |       |       |
|       | Viremia |      |      |       |       |       | 8.5   | 8.8   | 8.5   | 8.6   | 8.2   |       |       |       |       |       |
| 13    | IgM     |      |      |       |       |       | <1:20 | <1:20 |       |       | <1:20 | 1:10  | <1:20 | <1:20 |       |       |
|       | IgG     |      |      |       |       |       | <1:20 | <1:20 |       |       | 1:20  | 1:20  | 1:20  | 1:20  |       |       |
|       | Viremia |      |      |       |       |       | 8.6   | 8.4   |       |       | 8.4   | 8.1   | 8.0   | 7.4   |       |       |
