# Supplementary material for: Inflammatory and Humoral Immune Response during Ebola Virus Infection in Survivor and Fatal Cases Occurred in Sierra Leone during the 2014–2016 Outbreak in West Africa
Source: MDPI journal article supplement (doi:10.3390/v11040373), 2019-04-23
Supplement: s1 [file s1]

**Table S1.** Characteristics of EVD patients.

| <b>Total (n=44)</b>                        |                            |               |                             |               |
|--------------------------------------------|----------------------------|---------------|-----------------------------|---------------|
| <b>Age</b> (Mean $\pm$ SD; Median (range)) | 30 $\pm$ 16.7; 28.5 (2-72) |               |                             |               |
| <b>Sex</b> (% female)                      | 56.8%                      |               |                             |               |
| <b>Range of DSO</b> (Median)               | 3-15 (7,5)                 |               |                             |               |
| <b>Log EBOV RNA cp/mL</b>                  | <b>Acute</b>               |               | <b>Late</b>                 |               |
|                                            | 8.0 $\pm$ 0.8              |               | 5.8 $\pm$ 2.1               |               |
|                                            | <b>Survivors (n=21)</b>    |               | <b>Fatal (n=23)</b>         |               |
| <b>Age</b> (Mean $\pm$ SD; Median (range)) | 31 $\pm$ 17; 29 (7-72)     |               | 31.1 $\pm$ 16.8 ; 29 (2-65) |               |
| <b>Sex</b> (% female)                      | 52.4%                      |               | 60.9%                       |               |
| <b>Range of DSO</b> (Median)               | 1-14 (4)                   |               | 1-8 (4)                     |               |
| <b>Log EBOV RNA cp/mL</b>                  | <b>Acute</b>               | <b>Late</b>   | <b>Acute</b>                | <b>Late</b>   |
|                                            | 7.6 $\pm$ 0.7              | 4.4 $\pm$ 1.0 | 8.3 $\pm$ 0.8               | 7.6 $\pm$ 1.5 |
