# Supplementary material for: Inflammatory and Humoral Immune Response during Ebola Virus Infection in Survivor and Fatal Cases Occurred in Sierra Leone during the 2014–2016 Outbreak in West Africa
Source: MDPI journal article supplement (doi:10.3390/v11040373), 2019-04-23
Supplement: s1 [file s1]

**Table S2.** Fold-changes in the pathway-focused gene expression of the single secreted proteins.

A – Panel of analyzed genes

|   | 01     | 02    | 03     | 04    | 05     | 06     | 07        | 08      | 09      | 10       | 11    | 12    |
|---|--------|-------|--------|-------|--------|--------|-----------|---------|---------|----------|-------|-------|
| A | ADIPOQ | BMP2  | BMP4   | BMP6  | BMP7   | C5     | CCL1      | CCL11   | CCL13   | CCL17    | CCL18 | CCL19 |
| B | CCL2   | CCL20 | CCL21  | CCL22 | CCL24  | CCL3   | CCL5      | CCL7    | CCL8    | CD40LG   | CNTF  | CSF1  |
| C | CSF2   | CSF3  | CX3CL1 | CXCL1 | CXCL10 | CXCL11 | CXCL12    | CXCL13  | CXCL16  | CXCL2    | CXCL5 | CXCL9 |
| D | FASLG  | GPI   | IFNA2  | IFNG  | IL10   | IL11   | IL12A     | IL12B   | IL13    | IL15     | IL16  | IL17A |
| E | IL17F  | IL18  | IL1A   | IL1B  | IL1RN  | IL2    | IL21      | IL22    | IL23A   | IL24     | IL27  | IL3   |
| F | IL4    | IL5   | IL6    | IL7   | CXCL8  | IL9    | LIF       | LTA     | LTB     | MIF      | MSTN  | NODAL |
| G | OSM    | PPBP  | SPP1   | TGFB2 | THPO   | TNF    | TNFRSF11B | TNFSF10 | TNFSF11 | TNFSF13B | VEGFA | XCL1  |

B – Fold-changes of the mRNA levels in acute samples from EVD fatal patients versus EVD survivors

|   | 1   | 2    | 3    | 4    | 5   | 6    | 7    | 8    | 9    | 10   | 11   | 12   |
|---|-----|------|------|------|-----|------|------|------|------|------|------|------|
| A | 1,1 | 1,2  | -1,3 | -1,1 | 1,3 | 1,3  | 1,6  | 2,1  | 1,4  | 1,3  | 2,5  | 1,6  |
| B | 2,6 | 1,3  | 2,4  | 2,0  | 1,4 | 2,0  | -1,9 | 1,5  | 1,6  | -2,0 | 1,2  | 3,3  |
| C | 1,1 | -1,2 | -2,0 | 3,5  | 2,1 | 1,2  | 2,2  | 1,3  | 1,6  | 2,8  | -1,3 | 1,5  |
| D | 1,3 | -1,1 | 1,8  | 1,1  | 1,6 | -1,2 | 1,9  | -1,6 | -1,0 | -1,0 | 1,1  | 1,5  |
| E | 1,2 | 1,8  | 1,2  | 1,4  | 1,3 | -1,1 | 2,4  | 1,1  | 1,2  | 1,2  | 1,1  | 1,2  |
| F | 2,1 | 1,5  | 3,3  | -1,1 | 3,2 | 1,4  | 1,3  | 1,0  | 1,0  | 1,9  | 1,3  | 1,6  |
| G | 2,2 | -2,2 | 4,0  | -1,1 | 1,4 | 1,7  | 1,9  | -1,3 | 1,2  | 2,0  | 1,5  | -1,1 |

C – Fold-changes of the mRNA levels in late samples from EVD fatal patients versus EVD survivors

|   | 01  | 02   | 03   | 04  | 05  | 06  | 07   | 08   | 09  | 10   | 11   | 12   |
|---|-----|------|------|-----|-----|-----|------|------|-----|------|------|------|
| A | 1,2 | -1,3 | 2,0  | 1,2 | 1,9 | 1,5 | -1,3 | 2,3  | 3,4 | 1,3  | 4,5  | 2,6  |
| B | 8,3 | 1,7  | 2,4  | 1,3 | 1,4 | 8,0 | -1,4 | 2,5  | 1,0 | -1,7 | 1,9  | 1,5  |
| C | 1,4 | -1,4 | -1,6 | 2,6 | 5,5 | 6,2 | 6,4  | 2,1  | 1,2 | 2,8  | -1,5 | 3,5  |
| D | 1,6 | 1,9  | -1,2 | 1,4 | 1,4 | 1,3 | -1,4 | -1,4 | 2,3 | 2,1  | 1,3  | 1,6  |
| E | 1,7 | 1,2  | 1,2  | 1,9 | 3,3 | 2,2 | 1,4  | -1,4 | 1,9 | 1,2  | -1,0 | 1,9  |
| F | 2,6 | 1,9  | 5,5  | 1,2 | 1,6 | 1,3 | 1,1  | 1,2  | 1,2 | 2,1  | 1,3  | 2,3  |
| G | 2,6 | -3,4 | 6,2  | 2,5 | 1,2 | 2,5 | 1,5  | 2,6  | 1,1 | 2,0  | 3,4  | -1,0 |
